# Supplementary material for: Artificial intelligence after the bedside: co-design of AI-based clinical informatics workflows to routinely analyse patient-reported experience measures in hospitals
Source: PubMed Central journal article supplement — BMJ Health Care Inform. 2024 Dec 9;31(1):e101124. doi: 10.1136/bmjhci-2024-101124 (PMC11628959; doi:10.1136/bmjhci-2024-101124), 2024-12-09
Supplement: bmjhci-31-1-s001.pdf [file bmjhci-31-1-s001.pdf]

# Supplementary Material

Title: *AI after the bedside: a qualitative study to co-produce semi-automated clinical informatics workflows to routinely analyse patient-reported experience measures in hospitals and health services*

## Supplementary Material 1: Consolidated criteria for Reporting Qualitative Research (COREQ) checklist

| Topic                                          | Item No. | Guide Questions/Description                                                                                                                              | Reported on Page No. |
|------------------------------------------------|----------|----------------------------------------------------------------------------------------------------------------------------------------------------------|----------------------|
| <b>Domain 1: Research team and reflexivity</b> |          |                                                                                                                                                          |                      |
| <i>Personal characteristics</i>                |          |                                                                                                                                                          |                      |
| Interviewer/facilitator                        | 1        | Which author/s conducted the interview or focus group?                                                                                                   | Page 9               |
| Credentials                                    | 2        | What were the researcher's credentials? E.g. PhD, MD                                                                                                     | Page 9               |
| Occupation                                     | 3        | What was their occupation at the time of the study?                                                                                                      | Page 9               |
| Gender                                         | 4        | Was the researcher male or female?                                                                                                                       | N/A                  |
| Experience and training                        | 5        | What experience or training did the researcher have?                                                                                                     | Page 9               |
| <i>Relationship with participants</i>          |          |                                                                                                                                                          |                      |
| Relationship established                       | 6        | Was a relationship established prior to study commencement?                                                                                              | Page 8               |
| Participant knowledge of the interviewer       | 7        | What did the participants know about the researcher? e.g. personal goals, reasons for doing the research                                                 | Page 8               |
| Interviewer characteristics                    | 8        | What characteristics were reported about the interviewer/facilitator? e.g. Bias, assumptions, reasons and interests in the research topic                | Page 9               |
| <b>Domain 2: Study design</b>                  |          |                                                                                                                                                          |                      |
| <i>Theoretical framework</i>                   |          |                                                                                                                                                          |                      |
| Methodological orientation and Theory          | 9        | What methodological orientation was stated to underpin the study? e.g. grounded theory, discourse analysis, ethnography, phenomenology, content analysis | Page 6               |
| <i>Participant selection</i>                   |          |                                                                                                                                                          |                      |
| Sampling                                       | 10       | How were participants selected? e.g. purposive, convenience, consecutive, snowball                                                                       | Page 7-8             |
| Method of approach                             | 11       | How were participants approached? e.g. face-to-face, telephone, mail, email                                                                              | Page 7-8             |
| Sample size                                    | 12       | How many participants were in the study?                                                                                                                 | Page 10              |
| Non-participation                              | 13       | How many people refused to participate or dropped out? Reasons?                                                                                          | Page 10              |
| <i>Setting</i>                                 |          |                                                                                                                                                          |                      |
| Setting of data collection                     | 14       | Where was the data collected? e.g. home, clinic, workplace                                                                                               | Page 8               |
| Presence of non-participants                   | 15       | Was anyone else present besides the participants and researchers?                                                                                        | Page 8               |
| Description of sample                          | 16       | What are the important characteristics of the sample? e.g. demographic data, date                                                                        | Page 8               |
| <i>Data collection</i>                         |          |                                                                                                                                                          |                      |
| Interview guide                                | 17       | Were questions, prompts, guides provided by the authors? Was it pilot tested?                                                                            | Page 8-9             |
| Repeat interviews                              | 18       | Were repeat interviews carried out? If yes, how many?                                                                                                    | Page 8               |
| Audio/visual recording                         | 19       | Did the research use audio or visual recording to collect the data?                                                                                      | Page 8               |
| Field notes                                    | 20       | Were field notes made during and/or after the interview or focus group?                                                                                  | Page 8               |
| Duration                                       | 21       | What was the duration of the interviews or focus group?                                                                                                  | Page 8               |
| Data saturation                                | 22       | Was data saturation discussed?                                                                                                                           | N/A                  |
| Transcripts returned                           | 23       | Were transcripts returned to participants for comment and/or                                                                                             | Page 8               |

| Topic                                  | Item No. | Guide Questions/Description                                                                                                        | Reported on Page No. |
|----------------------------------------|----------|------------------------------------------------------------------------------------------------------------------------------------|----------------------|
|                                        |          | correction?                                                                                                                        |                      |
| <b>Domain 3: analysis and findings</b> |          |                                                                                                                                    |                      |
| <i>Data analysis</i>                   |          |                                                                                                                                    |                      |
| Number of data coders                  | 24       | How many data coders coded the data?                                                                                               | Page 9-10            |
| Description of the coding tree         | 25       | Did authors provide a description of the coding tree?                                                                              | Page 10-12           |
| Derivation of themes                   | 26       | Were themes identified in advance or derived from the data?                                                                        | Page 9-10            |
| Software                               | 27       | What software, if applicable, was used to manage the data?                                                                         | Page 9-10            |
| Participant checking                   | 28       | Did participants provide feedback on the findings?                                                                                 | Page 8               |
| <i>Reporting</i>                       |          |                                                                                                                                    |                      |
| Quotations presented                   | 29       | Were participant quotations presented to illustrate the themes/findings?<br>Was each quotation identified? e.g. participant number | Page 13-14           |
| Data and findings consistent           | 30       | Was there consistency between the data presented and the findings?                                                                 | Page 11, 15          |
| Clarity of major themes                | 31       | Were major themes clearly presented in the findings?                                                                               | Page 12              |
| Clarity of minor themes                | 32       | Is there a description of diverse cases or discussion of minor themes?                                                             | Page 11, 15          |

Developed from: Tong A, Sainsbury P, Craig J. Consolidated criteria for reporting qualitative research (COREQ): a 32-item checklist for interviews and focus groups. *International Journal for Quality in Health Care*. 2007. Volume 19, Number 6: pp. 349 – 35

**Supplementary material 2: Summary statistic of PREMs inpatient surveys administered in a statewide public health system in XX (n = 16 health services) (2020-2022)**

| Survey                     | Health Service    | Surveys Sent | Responses to survey | Responses to 'satisfaction with overall care' | % Responses to survey | % Responses to overall care |
|----------------------------|-------------------|--------------|---------------------|-----------------------------------------------|-----------------------|-----------------------------|
| PREMs Inpatient            | HS-Blue           | 13,467       | 1,543               | 1,440                                         | 11%                   | 93%                         |
|                            | <b>HS-Red*</b>    | 7,565        | 993                 | 918                                           | 13%                   | 92%                         |
|                            | HS-Green          | 497          | 63                  | 61                                            | 13%                   | 97%                         |
|                            | <b>HS-Orange*</b> | 11,152       | 1,415               | 1,316                                         | 13%                   | 93%                         |
|                            | HS-Yellow         | 15,444       | 2,416               | 2,259                                         | 16%                   | 94%                         |
|                            | HS-Pink           | 5,529        | 723                 | 667                                           | 13%                   | 92%                         |
|                            | <b>HS-Purple*</b> | 36,492       | 5,739               | 5,404                                         | 16%                   | 94%                         |
|                            | <b>HS-Navy*</b>   | 29,156       | 4,122               | 3,861                                         | 14%                   | 94%                         |
|                            | HS-Teal           | 1,368        | 131                 | 124                                           | 10%                   | 95%                         |
|                            | HS-Violet         | 946          | 117                 | 111                                           | 12%                   | 95%                         |
|                            | HS-Gold           | 15,581       | 2,151               | 2,016                                         | 14%                   | 94%                         |
|                            | HS-Silver         | 651          | 35                  | 31                                            | 5%                    | 89%                         |
|                            | HS-Turquoise      | 8,354        | 986                 | 926                                           | 12%                   | 94%                         |
|                            | <b>HS-Maroon*</b> | 8,560        | 1,035               | 957                                           | 12%                   | 92%                         |
|                            | HS-Aqua           | 7,826        | 969                 | 914                                           | 12%                   | 94%                         |
| PREMS Paediatric Inpatient | HS-Rainbow        | 12,694       | 1,544               | 1,448                                         | 12%                   | 94%                         |
| <b>Total (Phase 2)*</b>    |                   | 92,925       | 13,304              | 12,456                                        | 14%                   | 93%                         |
| Total (all)                |                   | 175,282      | 23,982              | 22,453                                        | 12%                   | 93%                         |

\*Health services included in phase 2 (current state vs. ideal future state)

**Supplementary material 3: Participant quotes supporting each theme related to current and future (ideal) state of PREMs free-text analysis workflows from key informant interviews**

| <b>Theme</b>                                                                       | <b>Quote reference</b> | <b>Participant quote</b>                                                                                                                                                                                                                                                                                                                                                                                                                    |
|------------------------------------------------------------------------------------|------------------------|---------------------------------------------------------------------------------------------------------------------------------------------------------------------------------------------------------------------------------------------------------------------------------------------------------------------------------------------------------------------------------------------------------------------------------------------|
| <b>Theme 1</b><br><i>Analysing and processing of PREMs data</i>                    | Quote 1A               | <i>"It's a manual process...it's me in a spreadsheet reading because I don't have a system" (HS-Red)</i>                                                                                                                                                                                                                                                                                                                                    |
|                                                                                    | Quote 1B               | <i>"It honestly is very time consuming...one of the things I did not - that is taking up a lot of time is that reading." (HS-Maroon)</i>                                                                                                                                                                                                                                                                                                    |
|                                                                                    | Quote 1C               | <i>"It takes a long time and it's not always necessarily as timely as I'd like it to be. You know, I don't always get to it." (HS-Orange)</i>                                                                                                                                                                                                                                                                                               |
| <b>Theme 2</b><br><i>Translating PREMs into quality improvement</i>                | Quote 2A               | <i>"We don't action anything we've got unless it's a bad thing. Then it's delivered to the local managers to act upon. And then I don't think there's really an evaluation as to whether that was effective or not. It's more of a complaint to management." (HS-Orange)</i>                                                                                                                                                                |
|                                                                                    | Quote 2B               | <i>"Have different people using and interpreting and understanding the data because the other important part was each service area has their own data and context in which that data is coming from... yep, I know where this problem sits and this is what we're going to do about it. I think it actually leads to quicker practice improvement and innovation than something that like a centralized system would have." (HS-Purple)</i> |
|                                                                                    | Quote 2C               | <i>"If something has changed in this month, we're able to go back and analyse and say what has changed, if it's staffing levels. Have we had high absenteeism? What has happened? Are we recruiting? And we look for what has been happening in that ward or particular division, and we determine why we've received that feedback and how we can improve." (HS-Maroon)</i>                                                                |
| <b>Theme 3</b><br><i>Desired characteristics of ideal PREMs analysis workflows</i> | Quote 3A               | <i>"If there was a program that could possible pick up the keywords and do the themes itself, it's very time consuming to read a lot of feedback and then put it under themes...It'd be great if there's a program that could pick up those keywords and allocate it against something like that so we wouldn't have to do that ourselves." (HS-Orange)</i>                                                                                 |
|                                                                                    | Quote 3B               | <i>"But I think we would need to know and be able to trust that it's picking up the right words. I don't understand it very well." (HS-Navy)</i>                                                                                                                                                                                                                                                                                            |
|                                                                                    | Quote 3C               | <i>"So much in the health system has been dehumanised, automated and disconnected. And especially when we're talking about the patient experience, it's when we need to put that human element back into it." (HS-Purple)</i>                                                                                                                                                                                                               |

|          |                                                                                                                                                                                                                                                                |
|----------|----------------------------------------------------------------------------------------------------------------------------------------------------------------------------------------------------------------------------------------------------------------|
| Quote 3D | <i>"You know we're not at the big house, we're [not a metropolitan facility] and yeah, the more of an even playing field we can all be to be able to benchmark [the better]." (HS-Red)</i>                                                                     |
| Quote 3E | <i>"It would be able to pull out these trends and these things that are happening so we could compare that to our other data sources...to get that bigger picture and drive meaningful change to say this is a problem in our health service." (HS-Orange)</i> |
| Quote 3F | <i>"[It] would be a challenge, but that's with any clinical change." (HS-Orange)</i>                                                                                                                                                                           |
| Quote 3G | <i>"So, I don't see [this change] as big at all because that's what we deal with on a daily basis, this change." (HS-Maroon)</i>                                                                                                                               |

## Supplementary material 4: Example inter-topic concept map generated by Leximancer

This concept map was generated from data exploring real-time clinical behaviour in a digital hospital published by our research team<sup>1</sup>.

From Leximancer's machine learning analysis, this map illustrates themes as coloured bubbles that are heat-mapped according to their frequency ('importance'), with warmer colours (red, yellow) indicating higher frequency and cooler colours (blue, purple) lower frequency. Concepts are displayed as dots within each coloured theme bubble and inter-linked across themes. Closer proximity of the coloured bubbles or concept dots indicates higher co-occurrence.

1. Canfell OJ, Meshkat Y, Kodyattu Z, et al. Understanding the Digital Disruption of Health Care: An Ethnographic Study of Real-Time Multidisciplinary Clinical Behavior in a New Digital Hospital. *Appl Clin Inform.* 2022/11/09 2022;13(05):1079-1091. doi:10.1055/s-0042-1758482

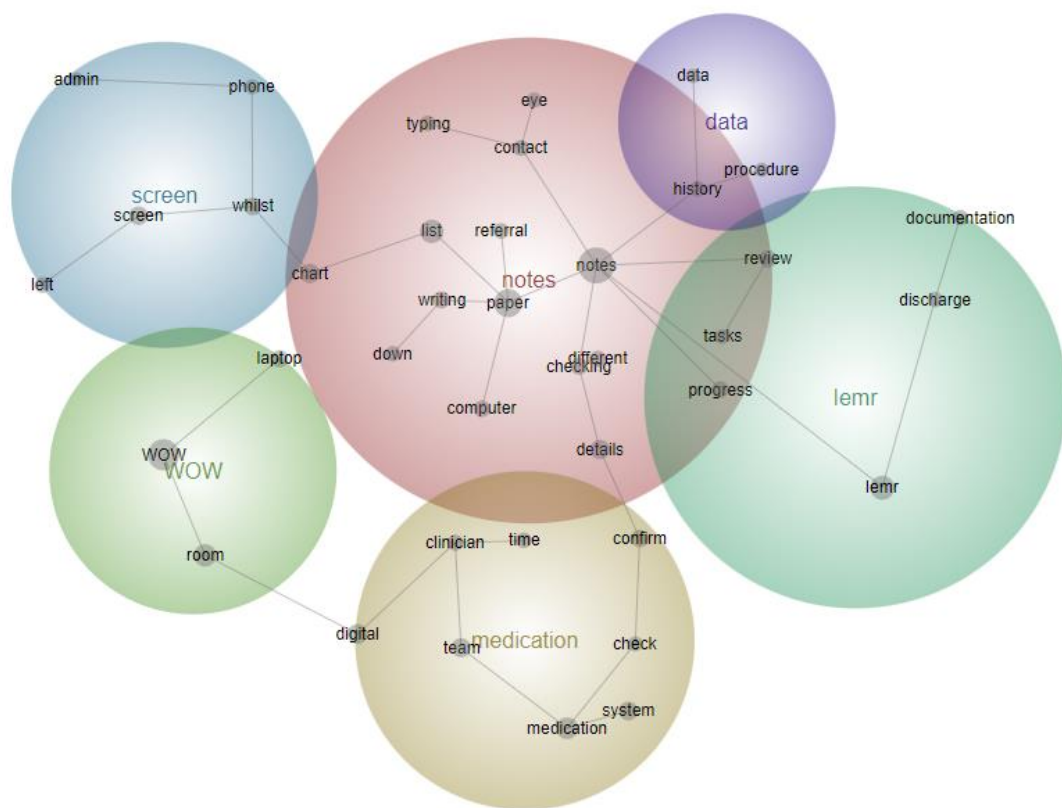

| Theme      | Hits |
|------------|------|
| notes      | 186  |
| medication | 138  |
| WOW        | 133  |
| lemr       | 66   |
| screen     | 51   |
| data       | 11   |
